# Supplementary material for: Diabetes Control and Complications Trial/Epidemiology of Diabetes Interventions and Complications Study at 30 Years: Advances and Contributions
Source: PubMed Central journal article supplement — Diabetes. 2013 Nov 16;62(12):3976–86. doi: 10.2337/db13-1093 (PMC3837056; doi:10.2337/db13-1093), 2013-11-16
Supplement: supp_62.12.3976_DB131093SupplementaryData.pdf [file supp_62.12.3976_DB131093SupplementaryData.pdf]

## SUPPLEMENTARY DATA

*The following persons and institutions participated in the DCCT/EDIC Study Research Group:*

*Study Chairmen - S. Genuth, D.M. Nathan, B. Zinman (vice-chair), O. Crofford (past)*  
*Albert Einstein College of Medicine - J. Crandall, M. Reid, J. Brown-Friday, S. Engel, J. Sheindlin, H. Martinez (past), H. Shamoon (past), H. Engel (past), M. Phillips*  
*Case Western Reserve University - R. Gubitosi-Klug, L. Mayer, S. Pendegast, H. Zegarra, D. Miller, L. Singerman, M. Novak, T. Nitzsche, W. Dahms (deceased), Saul Genuth (past), M. Palmert (past), E. Brown (past), S. Smith-Brewer (past)*  
*Cornell University Medical Center - D. Brillon, M.E. Lackaye, S. Kiss, R. Chan, A. Olin, V. Reppucci (past), T. Lee (past), M. Heinemann (past)*  
*Henry Ford Health System - F. Whitehouse, D. Kruger, J. K. Jones, D. Kahkonen (past), M. McLellan (past), J.D. Carey, E. Angus, A. Thomas, A. Galprin (past)*  
*International Diabetes Center - R. Bergenstal, G. Matfin, M. Johnson, K. Gunyou, M. Feldmann, S. Hepokoski, D. Etzwiler (deceased), M. Spencer (past), P. Hollander (past), D. Kendall (past), R. Cuddihy (past) K. Morgan (past), P. Callahan (past), S. List (past)*  
*Joslin Diabetes Center - Lloyd Paul Aiello, A. Jacobson (past), E. Golden, R. Beaser, O. Ganda, O. Hamdy, H. Wolpert, G. Sharuk, P. Arrigg, D. Schlossman, J. Rosenzweig (past), L. Rand (past)*  
*Massachusetts General Hospital - D.M. Nathan, M. Larkin, M. Christofi, J. Godine, E. Cagliero, P. Lou, K. Folino, S. Fritz (past), S. Crowell (past), K. Hansen (past), C. Gauthier-Kelly (past)*  
*Mayo Foundation - J. Service, G. Ziegler, A. Barkmeier, R. Rizza (past), B. Zimmerman (deceased), WF Schwenk (past), L. Schmidt (past), J. Pach (past)*  
*Medical University of South Carolina - Medical University of South Carolina - L. Luttrell, S. Caulder, M. Lopes-Virella, (past) J. Colwell (past), J. Soule (past), J. Fernandes, K. Hermayer, B. Hull, S. Kwon, C. Pittman, M. Brabham (past), A. Blevins (past), J. Parker (past), D. Lee (past), N. Patel (past), P. Lindsey (past), M. Bracey (past), K. Lee, M. Nutaitis, A. Farr (past), S. Elsing (past), T. Thompson (past), J. Selby (past), T. Lyons (past), S. Yacoub-Wasef (past), M. Szpiech (past), D. Wood (past), R. Mayfield (past)*  
*Northwestern University - M. Molitch, B. Schaefer, B. Metzger (past), L. Jampol, A. Lyon, M. Gill, Z. Rozenbajgier, L. Kaminski, R. Mirza, E. Simjanoski, D. Ryan, S. Ajroud-Driss (past)*  
*University of British Columbia – A. Morison, A. Jalbert, H. Tildesley, S. Leung, I. Begg, D. Johnson, S. Lalani, T. Kennedy, G. Meadows [Participants named to University of Washington in 1993 and the clinic closed]*  
*University of California, San Diego - O. Kolterman, G. Lorenzi, M. Goldbaum, G. Friedenber (deceased), M. Giotta (past), I. Grant (past), K.L.Jones (past), R. Kaplan (past), M. Prince (past), R. Lyon (past), R. Reed (past)*  
*University of Iowa - W. Sivitz, M. Bayless, J. Kramer, E. Aul, J. Folk, K. Gehr (past), B. Ginsberg, (past), R. Hoffman (past), A. Kimura, (past), D. Kurtzman (past), J. MacIndoe (past), V. Mahajan, N. Olson (past), K. Reissetter (past), S. Russell, H. Schrott (past), L. Snetselaar (past), E. Sohn, B. Tindal (deceased), T. Weingeist (past), R. Zeitler (past)*  
*University of Maryland School of Medicine - D. Counts, S. Johnsonbaugh, C. Vaughan, M. Hebdon (past), P. Salemi, R. Liss (past), T. Donner (past), J. Gordon (past), R. Hemady (past), A. Kowarski (past), D. Ostrowski (past) S. Steidl (past), B. Jones (past)*  
*University of Michigan - W.H. Herman, C.L. Martin, R. Pop-Busui, A. Sarma, J. Albers, E. Feldman, K. Kim, S. Elner, G. Comer, T. Gardner, R. Hackel, R. Prusak, L. Goings, A. Smith, J. Gothrup, P. Titus, J. Lee, M. Brandle, L. Prosser, D.A. Greene (past), M.J. Stevens (past), A. K. Vine (past), N. Burkhart (past), T. Sandford (past), J. Willis (past), J. Gothrup (past)*

## SUPPLEMENTARY DATA

University of Minnesota - J. Bantle, N. Wimmergren, A. Cochrane, J. Terry, T. Olsen (past), E. Steuer (past), P. Rath (past), B. Rogness (past)

University of Missouri - D. Hainsworth, D. Goldstein, S. Hitt, J. Giangiacomo (deceased)

University of New Mexico - D.S. Schade, J.L. Canady, M.R. Burge, A. Das, R. Avery, P.J. Boyle (past), J. Rich (past), C. Johannes (past), D. Hornbeck (past)

University of Pennsylvania – M.H. Schutta, A. Brucker, P. Bourne, S. Schwartz (past), S. Braunstein (past), B.J. Maschek – Carey (past)

University of Pittsburgh - T. Orchard, L. Cimino, N. Silvers (past), C. Ryan, T. Songer, B. Doff, S. Olson, R.L. Bergren, L. Lobes, P. Paczan Rath, D. Becker, D. Rubinstein, P.W. Conrad, S. Yalamanchi, J. Wesche, A. Drash (deceased)

University of South Florida - J. Malone, Co-PI A. Morrison, M.L. Bernal, P.R. Pavan), J. Vaccaro-Kish (past), N. Grove (past), D McMillan (past)

University of Tennessee - S. Dagogo-Jack, C. Wigley, H. Ricks, A. Kitabchi, M. B. Murphy (past), S. Moser (past), D. Meyer (past), A. Iannacone (past), E. Chaum, S. Yoser (past), M. Bryer-Ash (past), S. Schussler (past), H. Lambeth (past)

The University of Texas Southwestern Medical Center at Dallas - P. Raskin, S. Strowig, S. Cercone (past), M. Basco (past)

University of Toronto - B. Zinman, A. Barnie, R. Devenyi, M. Mandelcorn (past), M. Brent (past), S. Rogers, A. Gordon, N. Bakshi

University of Washington - J. Palmer, S. Catton, J. Brunzell, H. Wessells, I. H. de Boer, J. Purnell, J. Hokanson, J. Kinyoun, S. Deeb, M. Weiss, G. Meekins, J. Distad, L. J. Maki, Van Ottingham (past) J. Ginsberg (past)

University of Western Ontario – J. Dupre, J. Harth, M. Driscoll, D. Nicolle, J. Mahon (past), N.W. Rodger (past), M. Jenner (past), I. Hramiak (past), P. Colby (past), C. Canny (past)

Vanderbilt University - M. May, J. Lipps, A. Agarwal, T. Adkins, L. Survant, R. R. Lorenz (past), S. Feman (past)

Washington University, St. Louis - N. White, L. Levandoski, G. Grand, M. Thomas, D. Joseph, K. Blinder, G. Shah, N. Engelbrecht, B. Smith, I. Boniuk (past), D. Burgess (past), J. Santiago (deceased)

Yale University School of Medicine - W. Tamborlane, P. Gatcomb, K. Stoessel, K. Taylor (past), J. Goldstein (past), S. Novella (past), H. Mojibian (past), D. Cornfeld (past), J. Ahern (past)

Clinical Coordinating Center (Case Western Reserve University) - R. Gubitosi-Klug, J. Quin (past), P. Gaston, C. Beck, M. Palmert (past), E. Brown (past), R. Trail (past), W. Dahms (deceased)

Data Coordinating Center (The George Washington University, The Biostatistics Center) - J. Lachin, P. Cleary, J. Backlund, W. Sun, B. Braffett, P. McGee, K. Klumpp, L. Diminick, W. Hsu, X. Gao, S. Ho, M. Hawkins, M. Davis (past), A. Determan (past), C.D. Kenny (past), K. Chan (past), B. Petty (past), C. Williams (past), B. Rutledge (past), N. Younes (past), D. Rosenberg (past), N. Janifer (past), K. Anderson (past), S. Villavicencio (past), L. Dews (past), V. Yalamanchili (past)

National Institute of Diabetes and Digestive and Kidney Disease Program Office - C. Cowie, J. Fradkin, E. Leschek, C. Siebert (past), R. Eastman (past)

Central Fundus Photograph Reading Center (University of Wisconsin) - R. Danis, S. Gangaputra, M. Davis (past), L. Hubbard (past), S. Neill (past), H. Wabers, R. Sussman, T. Harding, J. Reimers

Central Biochemistry Laboratory (University of Minnesota) - M. Steffes, J. Bucksa (past), M. Nowicki, B. Chavers

## SUPPLEMENTARY DATA

*Central Carotid Ultrasound Unit (New England Medical Center) - D. O'Leary, J. Polak, A. Harrington, L. Funk (past)*  
*Central ECG Reading Unit (University of Minnesota) – R. Crow (past), B. Gloeb (past), S. Thomas (past), C. O'Donnell (past)*  
*Central ECG Reading Unit (Wake Forest University) – E.Z. Soliman, Z.M. Zhang, C. Campbell, Y. Li, R. Prineas (past)*  
*Central Neuropsychological Coding Unit – C. Ryan, D. Sandstrom, T. Williams, M. Geckle, E. Cupelli, F. Thoma, B. Burzuk, T. Woodfill*  
*Central ANS Reading Unit (Mayo Clinic) – P. Low, C. Sommer, K. Nickander*  
*Computed Tomography Reading Center (Harbor UCLA Research and Education Institute) – M. Budoff, R. Detrano(past), N. Wong, M. Fox, L. Kim (past), R. Oudiz*  
*Johns Hopkins Medical Institutions – J. Lima, D. Bluemke, E. Turkbey, R. J. van der Geest, C. Liu, A. Malayeri, A. Jain, C. Miao (past), H. Chahal (past), Jarboe (past)*  
*Observational Study Monitoring Board – G. Weir (Chairman), C. Clark (past), R. D'Agostino (past), M. Espeland, B. Klein, T Manolio, L. Rand, D. Singer, M. Stern, A.E. Boulton, C. Hsu (past)*  
*Molecular Risk Factors Program Project (Medical University of South Carolina) - M. Lopes-Virella, W.T. Garvey (past), T.J. Lyons, A. Jenkins, R. Klein, G. Virella, A. Jaffa, Rickey Carter, D. Lackland (past), M. Brabham (past), D. McGee (past), D. Zheng (past), R. K. Mayfield (past)*  
*Genetic Studies Group (Hospital for Sick Children) - A. Paterson, A. Boright, S. Bull, L. Sun, S. Scherer (past), B. Zinman (past)*  
*SCOUT (VeraLight) – J. Maynard, J. Way (past)*  
*Epigenetics (Beckman Research Institute of City of Hope) – R. Natarajan, F. Miao, L. Zhang, Z. Chen*

*Editor, EDIC Publications - D.M. Nathan*
